# Supplementary figures and images for: Specific Immunosuppression with Inducible Foxp3-Transduced Polyclonal T cells
Source: PLOS journal article supplement (doi:10.1371/journal.pbio.0060276), 2008-11-06

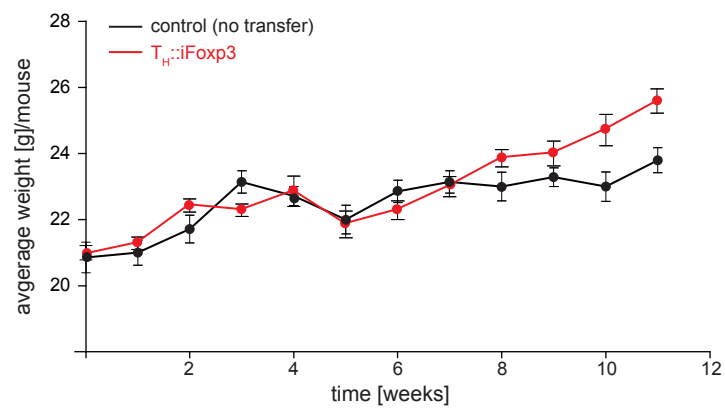

Supplement: S3 (10.1371/journal.pbio.0060276.s003) [file journal.pbio.0060276.s003]
